# Supplementary figures and images for: Role of Hippo/ACSL4 axis in ferroptosis-induced pericyte loss and vascular dysfunction in sepsis
Source: PubMed Central journal article supplement — Redox Biol. 2024 Nov 12;78:103353. doi: 10.1016/j.redox.2024.103353 (PMC11617880; doi:10.1016/j.redox.2024.103353), 2024-11-12

**A**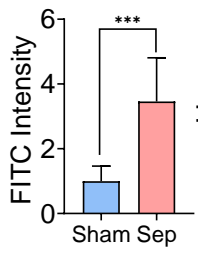**B**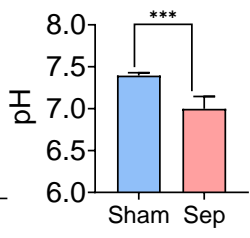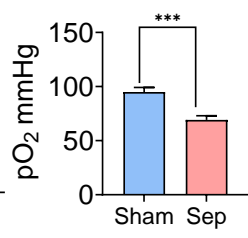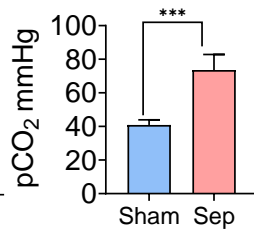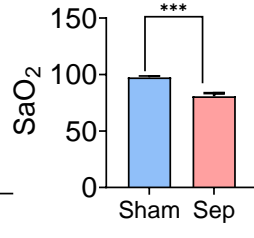**C**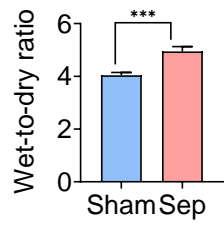

Supplement: mmc1.pdf [file mmc1.pdf]

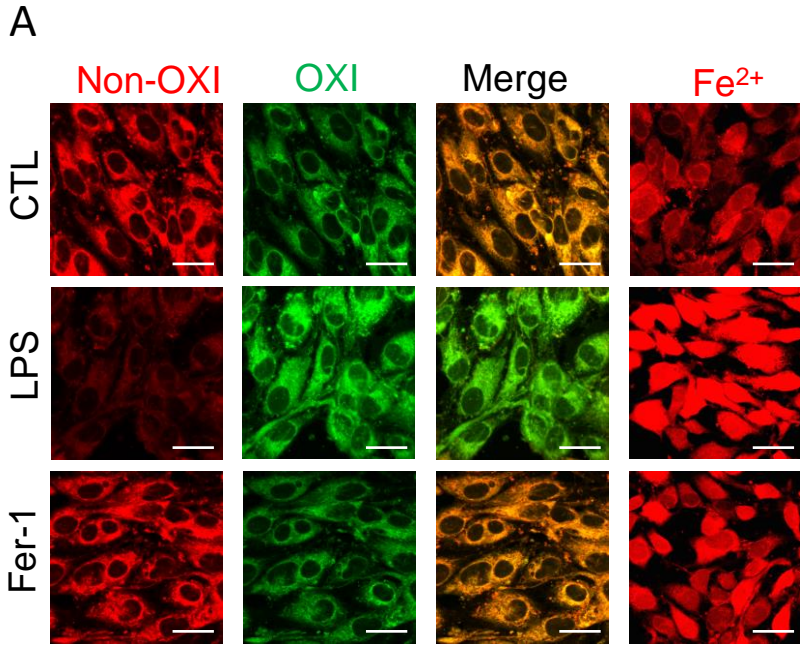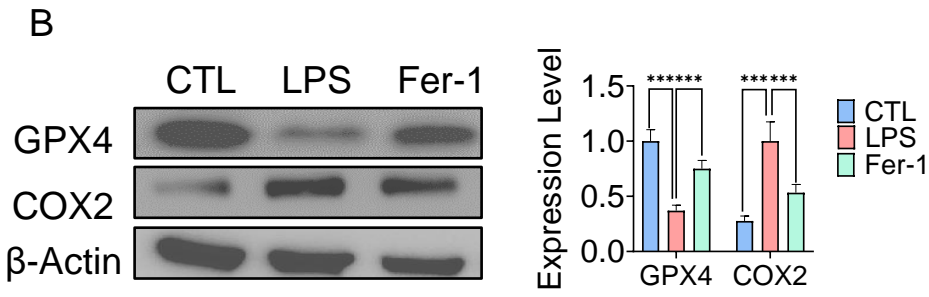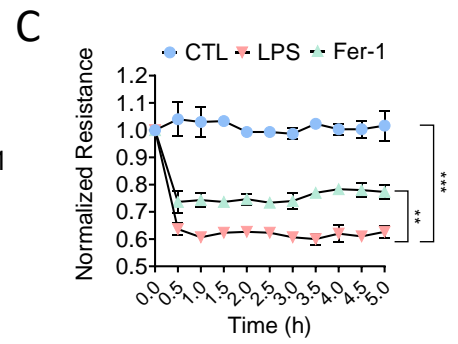

Supplement: mmc2.pdf [file mmc2.pdf]

A

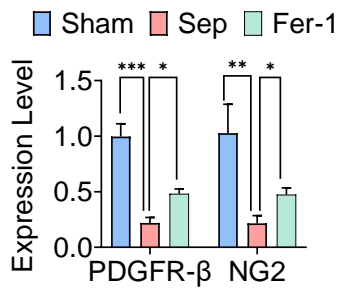

B

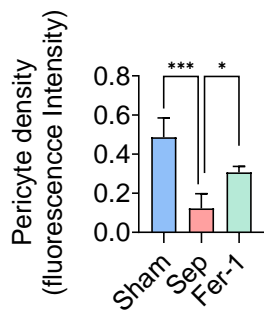

C

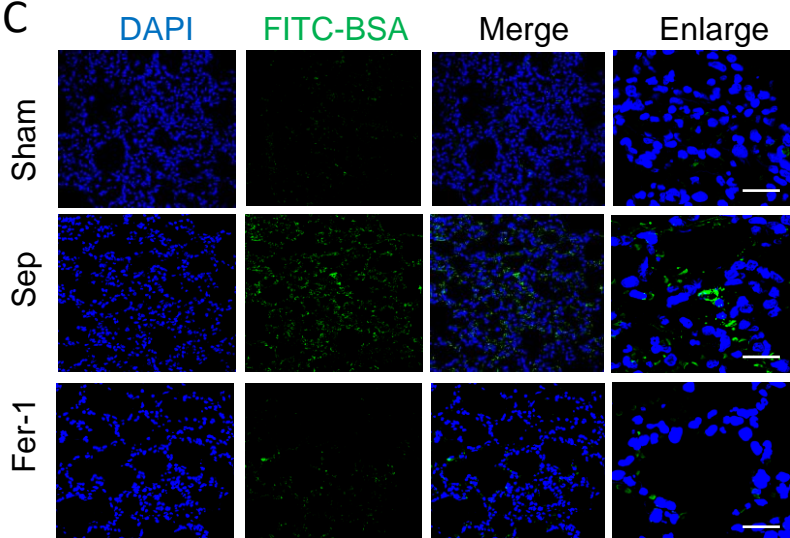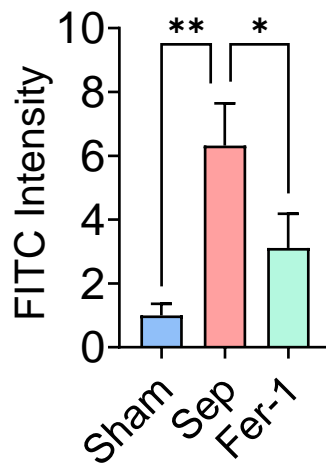

D

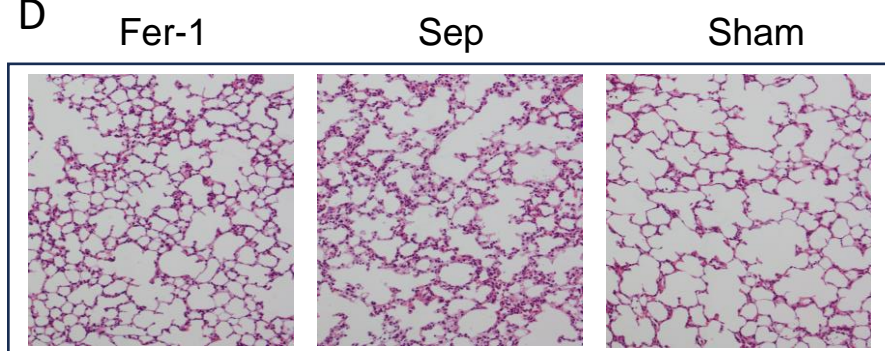

E

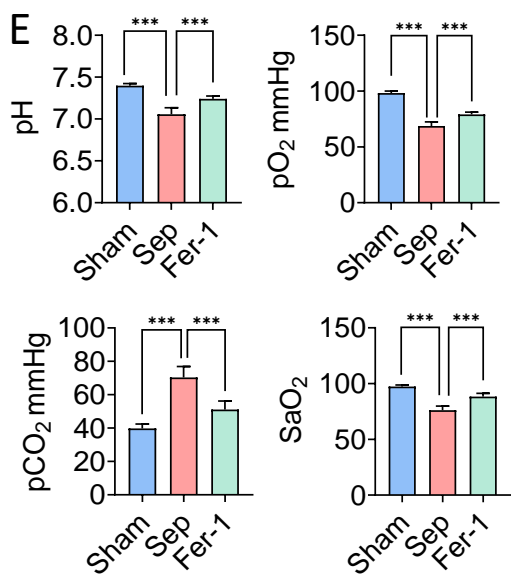

Supplement: mmc3.pdf [file mmc3.pdf]

A

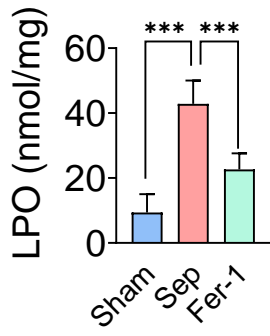

B

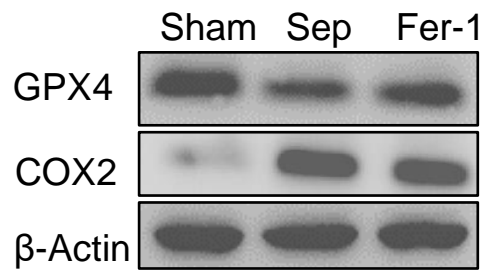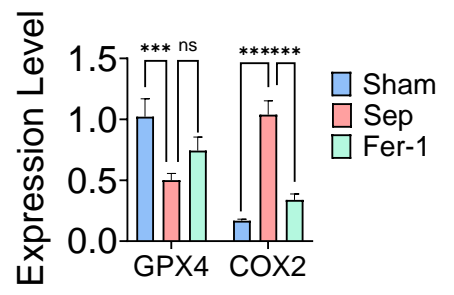

Supplement: mmc4.pdf [file mmc4.pdf]

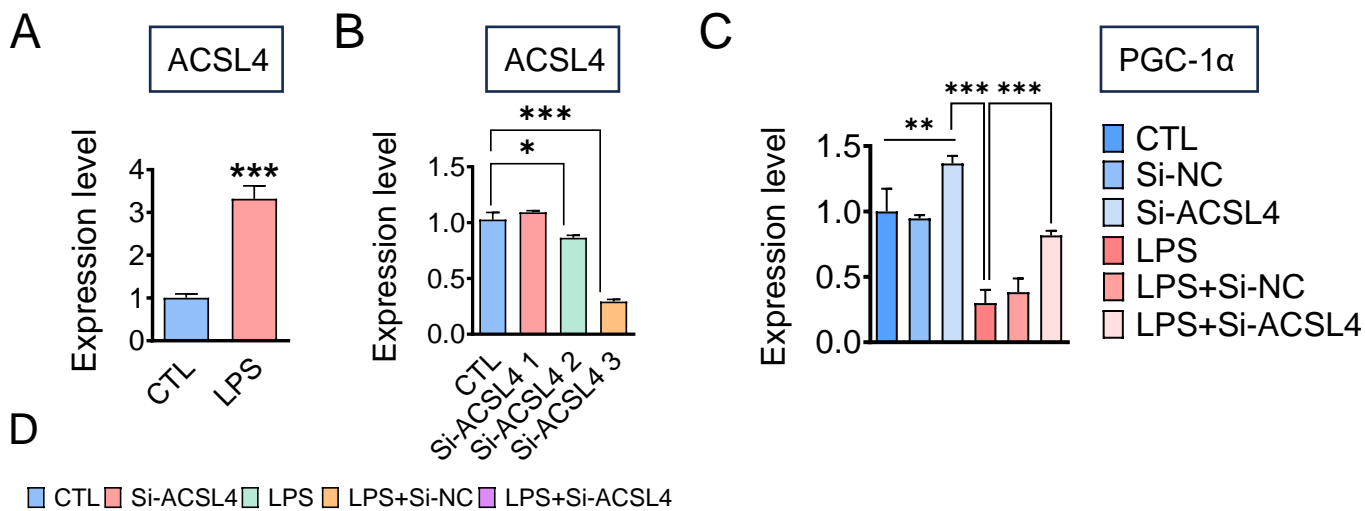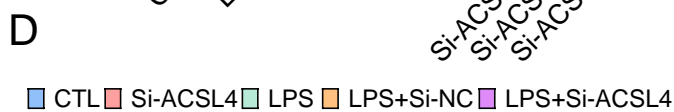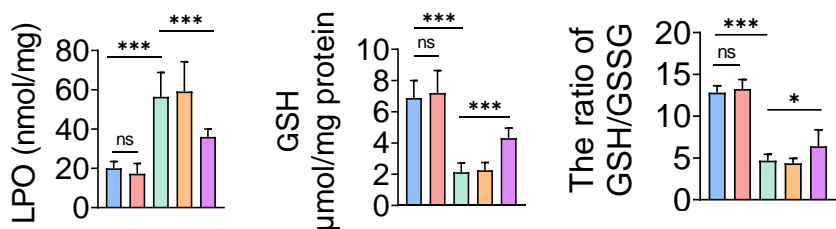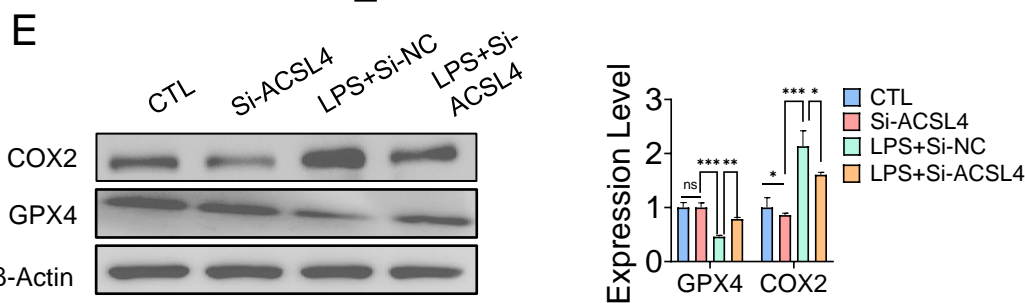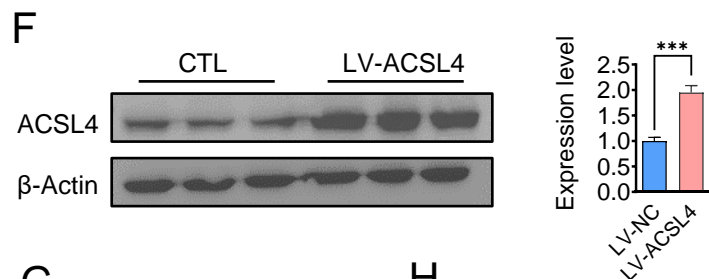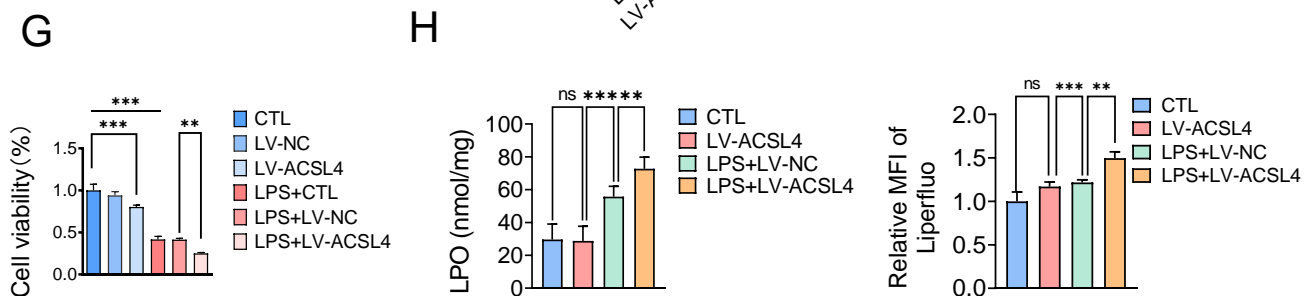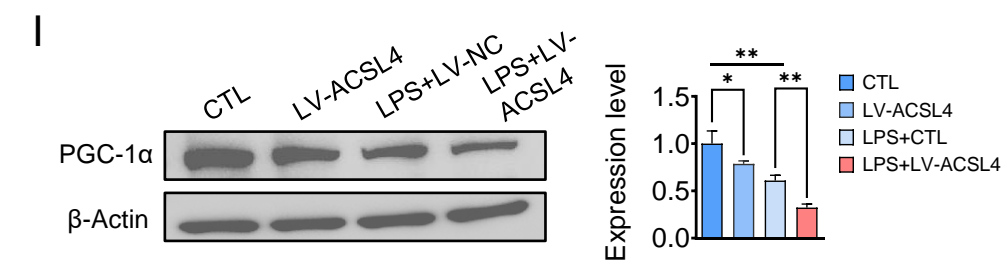

Supplement: mmc5.pdf [file mmc5.pdf]

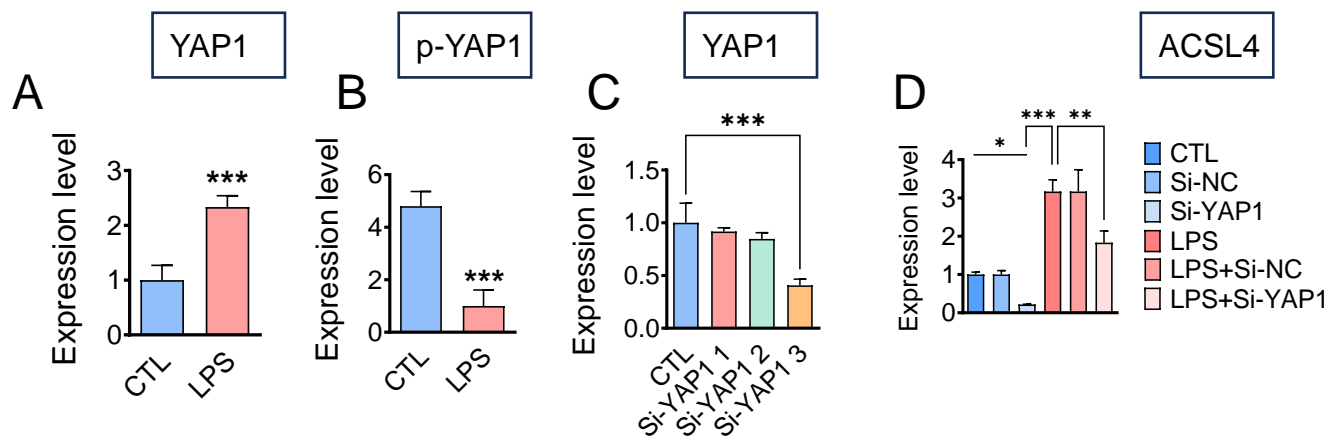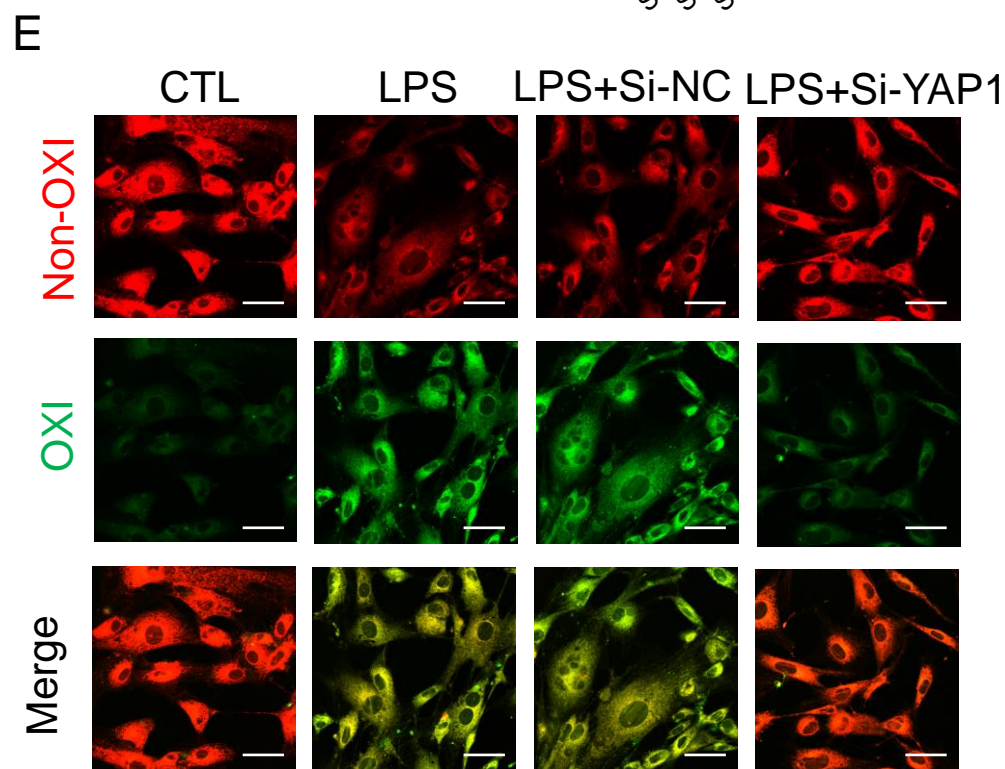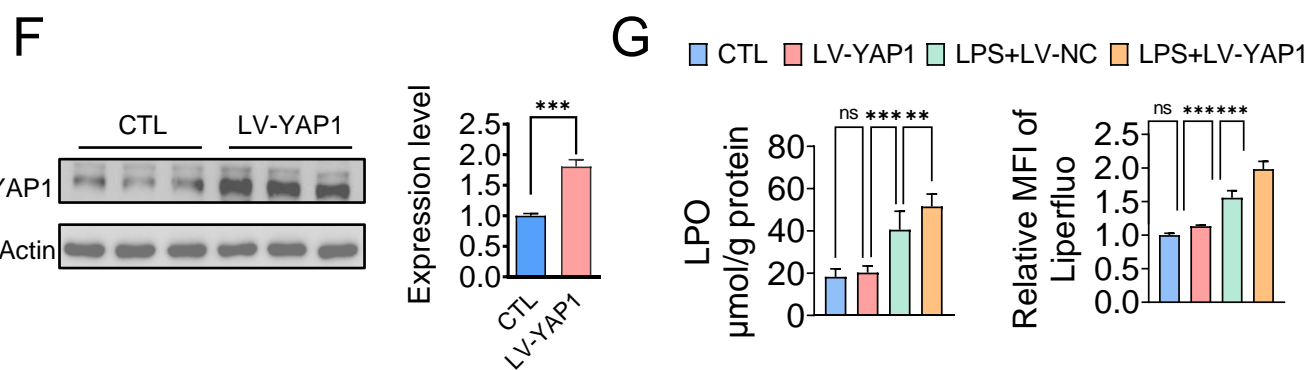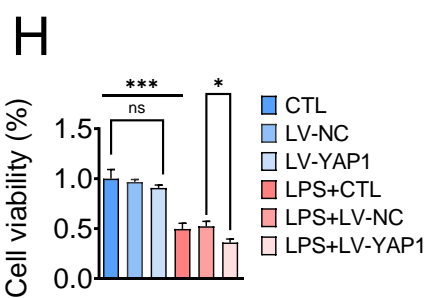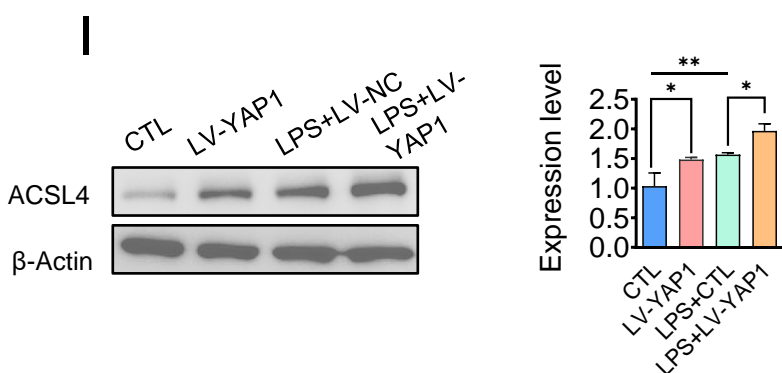

Supplement: mmc6.pdf [file mmc6.pdf]

A

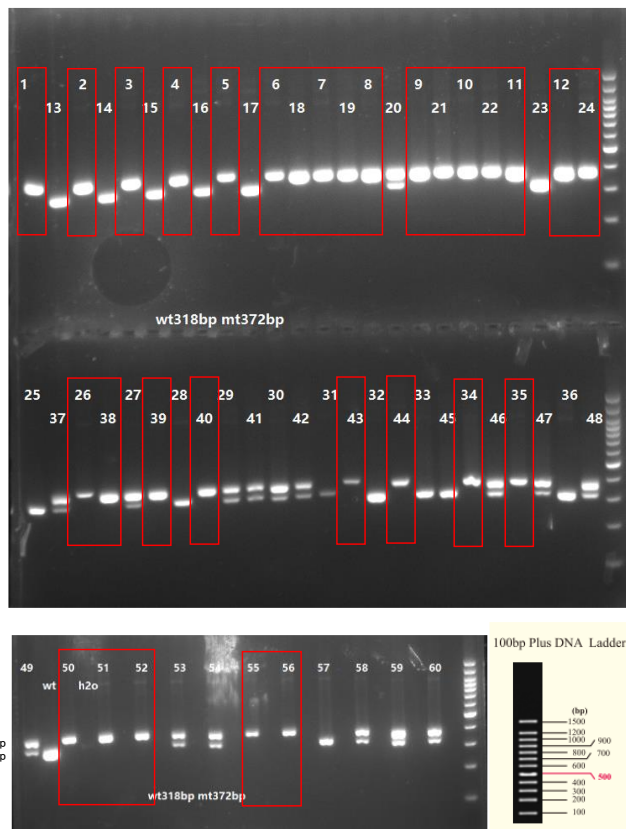

B

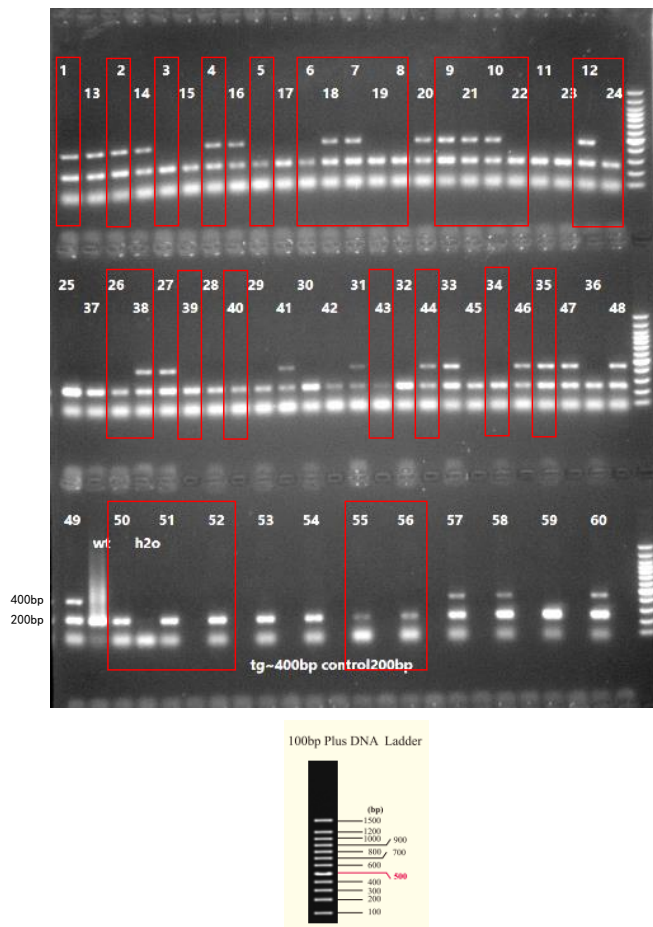

Supplement: mmc7.pdf [file mmc7.pdf]

**A**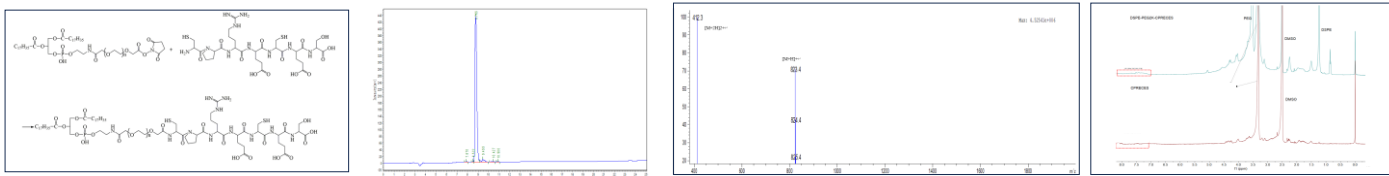**B**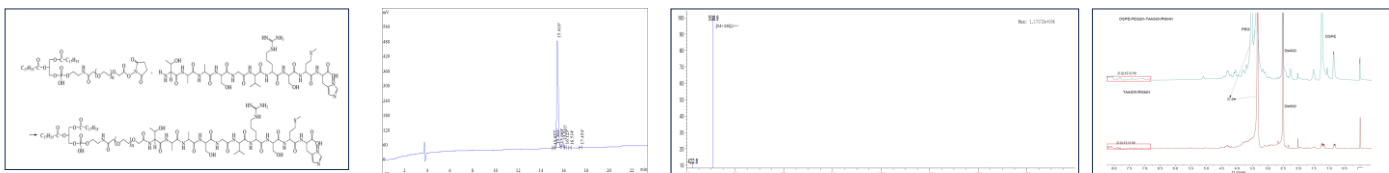**C**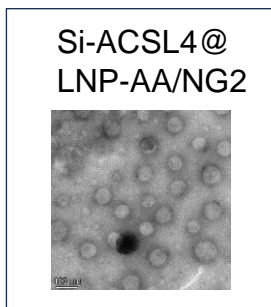**D**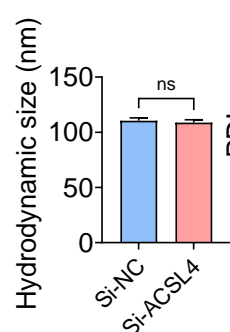**E**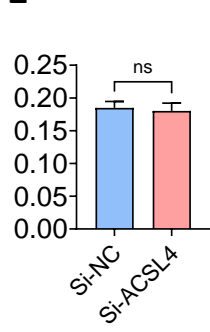**F**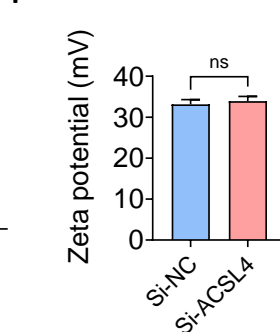**G**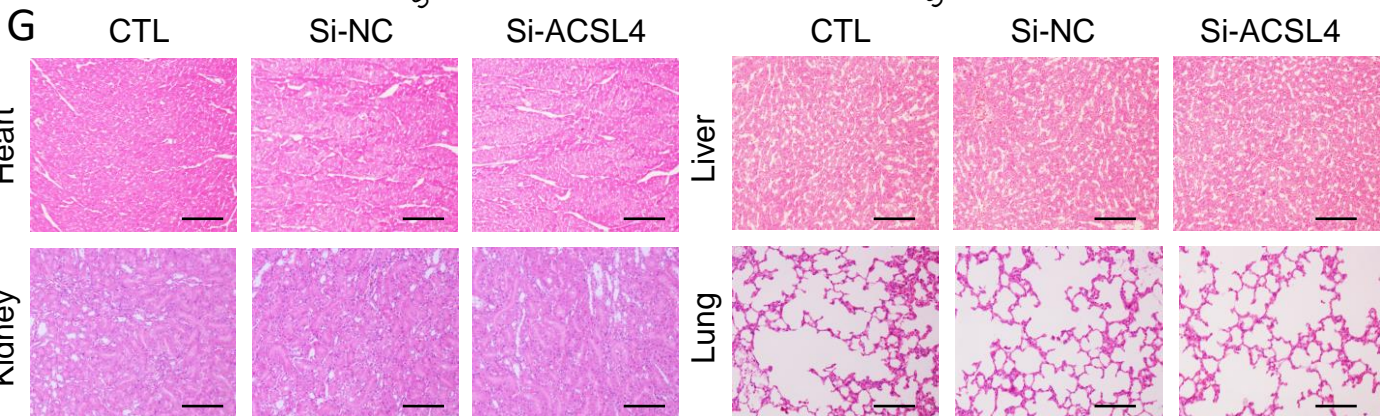**H**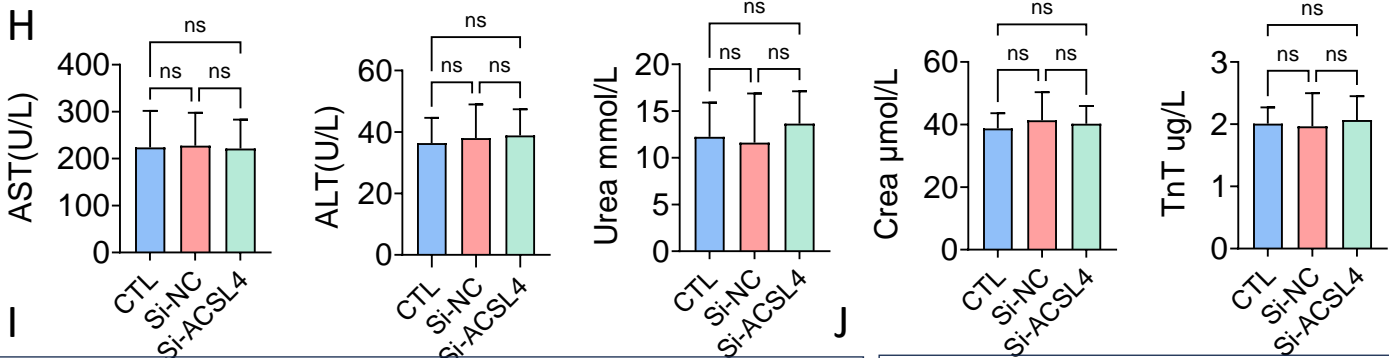**I**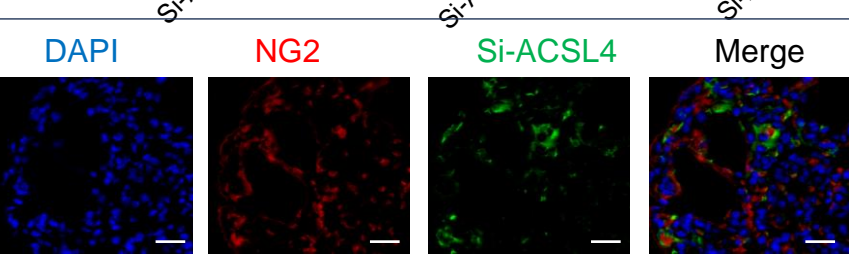**J**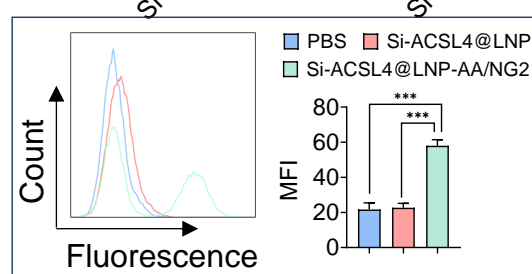

Supplement: mmc8.pdf [file mmc8.pdf]

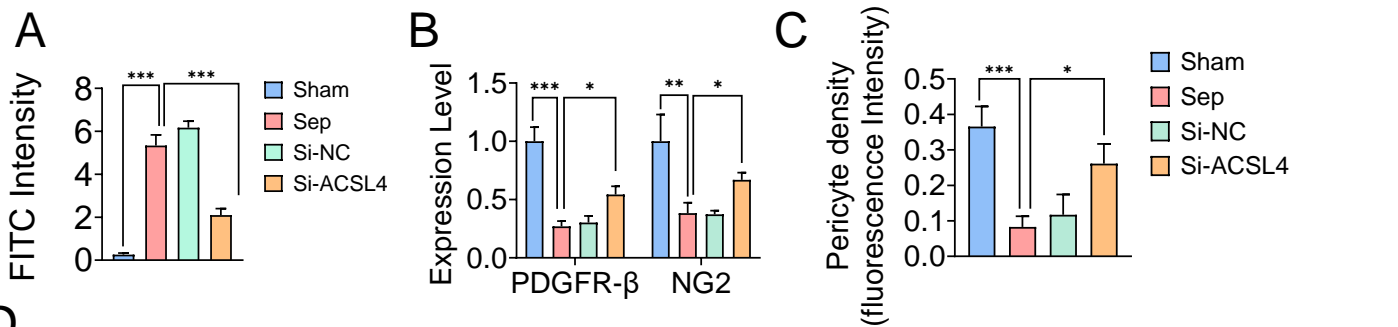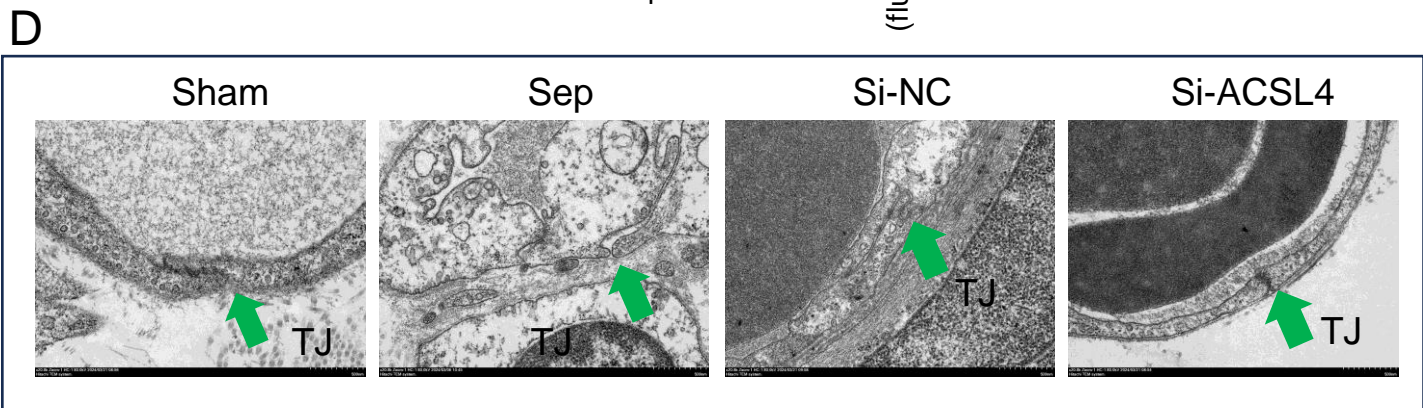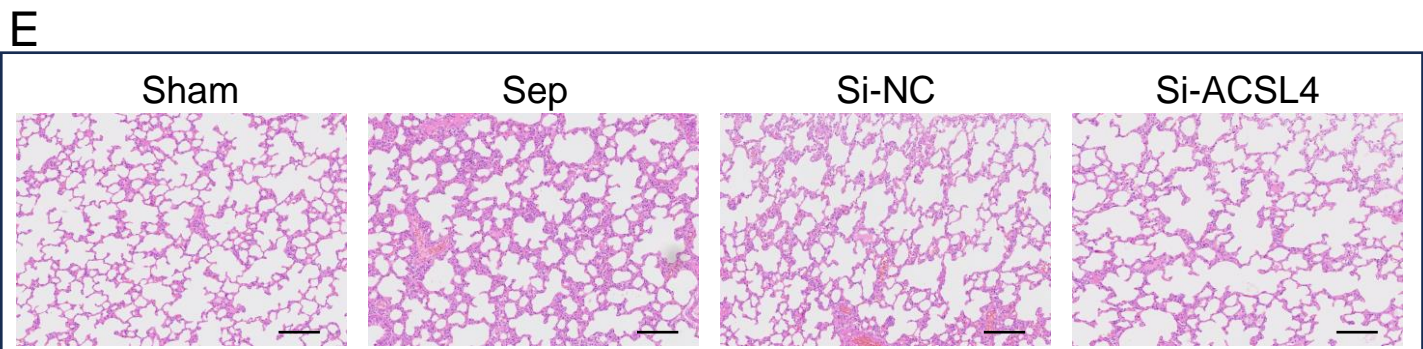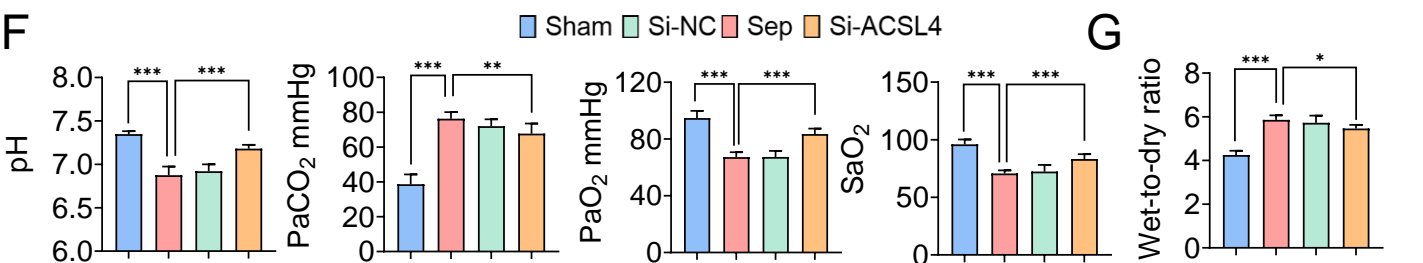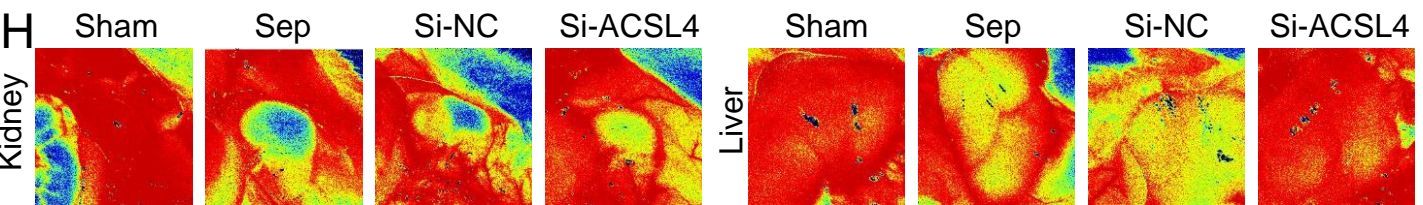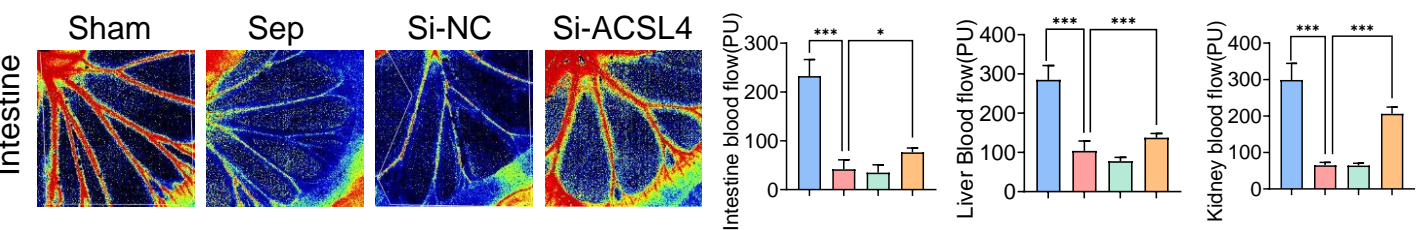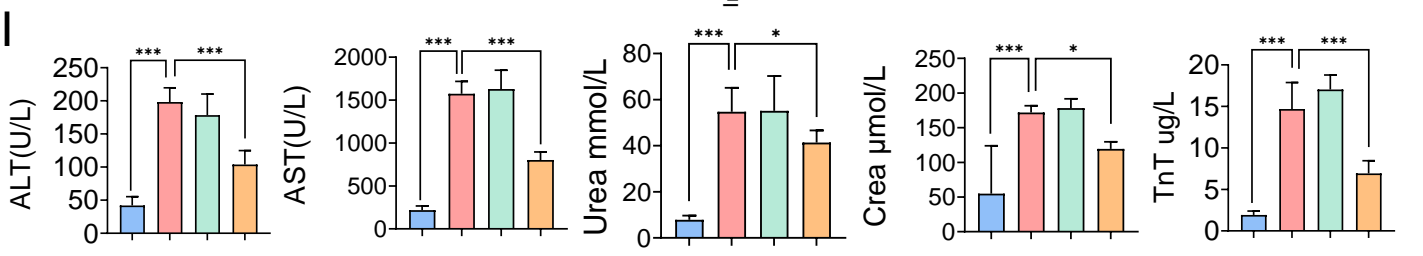

Supplement: mmc9.pdf [file mmc9.pdf]
